# Supplementary material for: Identification, Characterization, and Genomic Analysis of Novel Serratia Temperate Phages from a Gold Mine
Source: MDPI journal article supplement (doi:10.3390/ijms21186709), 2020-09-13
Supplement: s1 [file s1]

# **Supplementary materials for**

## **Identification, Characterization and Genomic Analysis of Novel *Serratia* Temperate Phages from a Gold Mine**

**Katarzyna Bujak, Przemyslaw Decewicz, Jerzy Kaminski, and Monika Radlinska\***

This PDF file includes:

Tables S1 to S9

Figures S1 to S7

References

**Table S1.** Characterization of annotated *Serratia* phage genomes available in the NCBI Viral RefSeq database.

| Phage name | Size (bp) | Acc. No.  | CDS | tRNA | Temperate /virulent | Family                  | Place of phage isolation                                         | Host name                                                                  | Place of host isolation                                       | References  |
|------------|-----------|-----------|-----|------|---------------------|-------------------------|------------------------------------------------------------------|----------------------------------------------------------------------------|---------------------------------------------------------------|-------------|
| 2050H1     | 159631    | MF285619  | 214 | 0    | V                   | <i>Ackermannviridae</i> | raw sewage                                                       | <i>S. marcescens</i> wk2050                                                | clinical samples                                              | [1]         |
| 2050H2     | 39216     | MF285620  | 43  | 0    | V                   | <i>Podoviridae</i>      | no data                                                          | no data                                                                    | no data                                                       | Unpublished |
| 2050HW     | 276025    | MF285618  | 363 | 0    | V                   | <i>Myoviridae</i>       | raw sewage                                                       | <i>S. marcescens</i> wk2050                                                | clinical samples                                              | [1]         |
| 3M         | 159398    | MH929319  | 201 | 2    | V                   | <i>Ackermannviridae</i> | polluted water                                                   | <i>S. marcescens</i> 2170c                                                 | no data                                                       | [2]         |
| BF         | 357154    | NC_041917 | 550 | 29   | V                   | <i>Myoviridae</i>       | composted grass                                                  | <i>S. marcescens</i> UCC2017                                               | composted grass                                               | [3]         |
| CBH8       | 171175    | MF036691  | 277 | 15   | V                   | <i>Myoviridae</i>       | sewage treatment plant                                           | <i>Serratia</i> sp. ATCC 39006                                             | laboratory strain (originally from channel water)             | [4]         |
| CHI14      | 171175    | NC_041996 | 277 | 15   | V                   | <i>Myoviridae</i>       | sewage treatment plant                                           | <i>Serratia</i> sp. ATCC 39006                                             | laboratory strain (originally from channel water)             | [4]         |
| Eta        | 42724     | NC_021563 | 69  | 0    | T                   | <i>Siphoviridae</i>     | Supernatant of an overnight culture of a <i>S. marcescens</i> ES | <i>S. marcescens</i> CV/rc3 (HER 1311)                                     | Centre de Référence pour les Virus Bactériens Félix d'Hérelle | [5]         |
| IME250     | 154938    | NC_042047 | 194 | 4    | V                   | <i>Ackermannviridae</i> | hospital sewage                                                  | <i>Serratia rubidaea</i>                                                   | clinical samples                                              | [6]         |
| JS26       | 63971     | MN505213  | 84  | 0    | V                   | <i>Siphoviridae</i>     | no data                                                          | <i>Serratia</i> sp. ATCC 39006                                             | laboratory strain (originally from channel water)             | [7]         |
| MAM1       | 157834    | NC_020083 | 201 | 3    | V                   | <i>Ackermannviridae</i> | sewage treatment plant                                           | <i>S. plymuthica</i> , <i>S. marcescens</i> , <i>Kluyvera cryocrescens</i> | clinical samples, enviromental samples and laboratory strains | [8]         |
| Moabite    | 273933    | MK994515  | 338 | 2    | V                   | <i>Myoviridae</i>       | swine farm samples                                               | <i>S. marcescens</i> D1                                                    | clinical samples                                              | [9]         |
| MTx        | 68621     | MK618717  | 103 | 0    | V                   | <i>Myoviridae</i>       | activated sludge                                                 | <i>S. marcescens</i> D1                                                    | clinical samples                                              | [10]        |
| Muldoon    | 167547    | MN095771  | 259 | 4    | V                   | <i>Myoviridae</i>       | wastewater treatment plant                                       | <i>S. marcescens</i> D1                                                    | clinical samples                                              | [11]        |
| MyoSmar    | 68745     | MN062189  | 105 | 0    | V                   | <i>Myoviridae</i>       | park pond                                                        | <i>S. marcescens</i> D1                                                    | clinical samples                                              | [12]        |
| Parlo      | 62853     | MK618715  | 87  | 0    | T                   | <i>Podoviridae</i>      | pooled swine, fecal and soil                                     | <i>S. marcescens</i> D1                                                    | clinical samples                                              | [13]        |
| PCH45      | 212807    | MN334766  | 225 | 0    | V                   | <i>Myoviridae</i>       | sewage                                                           | <i>Serratia</i> sp. ATCC 39006                                             | laboratory strain (originally from channel water)             | [14]        |
| PhiZZ30    | 167484    | MT176426  | 268 | 9    | V                   | <i>Myoviridae</i>       | no data                                                          | no data                                                                    | no data                                                       | Unpublished |
| Pila       | 38678     | MN098329  | 52  | 0    | V                   | <i>Podoviridae</i>      | municipal wastewater                                             | <i>S. marcescens</i> D1                                                    | clinical samples                                              | [15]        |

|        |        |           |     |    |   |                     |                        |                                |                                                   |           |
|--------|--------|-----------|-----|----|---|---------------------|------------------------|--------------------------------|---------------------------------------------------|-----------|
| PS2    | 167266 | NC_024121 | 276 | 4  | V | <i>Myoviridae</i>   | fishpond water         | <i>S. marcescens</i> S2        | clinical samples                                  | [16]      |
| Scaap  | 42969  | MH553517  | 59  | 0  | V | <i>Siphoviridae</i> | activated sludge       | <i>S. marcescens</i>           | water treatment plant                             | [17]      |
| Serbin | 42882  | MK608336  | 66  | 0  | V | <i>Siphoviridae</i> | pond water             | <i>S. marcescens</i>           | pond water                                        | [18]      |
| Slocum | 112436 | MN095770  | 168 | 23 | V | <i>Siphoviridae</i> | municipal wastewater   | <i>S. marcescens</i> D1        | clinical samples                                  | [19]      |
| SM9-3Y | 39631  | KX778611  | 48  | 0  | V | <i>Podoviridae</i>  | raw sewage             | <i>S. marcescens</i>           | clinical sapmles                                  | [20]      |
| X20    | 172450 | MF036692  | 279 | 17 | V | <i>Myoviridae</i>   | sewage treatment plant | <i>Serratia</i> sp. ATCC 39006 | laboratory strain (originally from channel water) | [4]       |
| BZS1   | 44995  | MT843275  | 74  | 0  | T | <i>Myoviridae</i>   | gold and arsenic mine  | <i>Serratia</i> sp. OS31       | gold and arsenic mine                             | This work |
| OS31   | 42280  | MT843276  | 60  | 0  | T | <i>Siphoviridae</i> | gold and arsenic mine  | <i>Serratia</i> sp. OS31       | gold and arsenic mine                             | This work |

**Table S2.** Genes located within the vB\_SspM\_BZS1 phage. Proteins identified by mass spectrometry are highlighted in bold.

| ORF no. | Coding region (bp) | Strand | Protein size (aa) | Predicted function                           |
|---------|--------------------|--------|-------------------|----------------------------------------------|
| 1       | 75-674             | +      | 199               | terminase small subunit                      |
| 2       | 646-2625           | +      | 659               | terminase large subunit                      |
| 3       | 2634-2897          | +      | 87                | head-tail adapter                            |
| 4       | 2963-4543          | +      | 526               | portal protein                               |
| 5       | 4540-5400          | +      | 286               | head-tail preconnector protease              |
| 6       | 5404-6003          | +      | 199               | hypothetical protein                         |
| 7       | 6003-6404          | +      | 133               | <b>head decoration protein</b>               |
| 8       | 6508-7557          | +      | 349               | <b>major capsid protein</b>                  |
| 9       | 7559-7981          | +      | 140               | hypothetical protein                         |
| 10      | 7981-8325          | +      | 114               | head-tail joining protein                    |
| 11      | 8322-8864          | +      | 180               | <b>ATP-binding tail sheath protein</b>       |
| 12      | 8869-9063          | +      | 64                | DUF2635 domain-containing protein Mup38      |
| 13      | 9060-10565         | +      | 501               | <b>tail sheath protein, Mup39</b>            |
| 14      | 10575-10943        | +      | 122               | <b>tail tube protein Mup40</b>               |
| 15      | 10945-11235        | +      | 96                | tail assembly chaperone protein Mup41        |
| 16      | 11357-13276        | +      | 639               | tape measure protein, Mup42                  |
| 17      | 13313-14716        | +      | 467               | <b>tail/DNA circulation protein, Mup43</b>   |
| 18      | 14713-15783        | +      | 356               | <b>baseplate wedge protein, Mup44</b>        |
| 19      | 15783-16373        | +      | 196               | <b>baseplate assembly protein, Mup45</b>     |
| 20      | 16370-16807        | +      | 145               | <b>tail protein, Mup46</b>                   |
| 21      | 16811-17959        | +      | 382               | <b>tail protein, Mup47</b>                   |
| 22      | 17956-18630        | +      | 224               | <b>tail protein YmfQ family</b>              |
| 23      | 18674-19162        | +      | 162               | tail protein                                 |
| 24      | 19193-20323        | -      | 376               | peptidoglycan/LPS O-acetylase                |
| 25      | 20333-20605        | -      | 90                | XRE family transcriptional regulator         |
| 26      | 20643-20816        | -      | 57                | hypothetical protein                         |
| 27      | 20926-23307        | +      | 793               | <b>tail fibre/acetylerase</b>                |
| 28      | 23308-24213        | +      | 301               | <b>virion-associated protein<sup>a</sup></b> |
| 29      | 24493-25656        | -      | 387               | tyrosine integrase                           |
| 30      | 25512-25880        | -      | 122               | excisionase                                  |
| 31      | 25892-26116        | -      | 74                | hypothetical protein                         |
| 32      | 26038-26700        | -      | 220               | DNA methyltransferase MT-A70 family          |
| 33      | 26703-26885        | -      | 60                | ANR family transcriptional regulator         |
| 34      | 26901-27281        | -      | 126               | hypothetical protein                         |
| 35      | 27284-27493        | -      | 69                | HigB-like protein                            |
| 36      | 27513-27731        | -      | 71                | hypothetical protein                         |
| 37      | 27747-28016        | -      | 89                | hypothetical protein                         |
| 38      | 28062-28763        | -      | 233               | hypothetical protein                         |
| 39      | 28773-29027        | -      | 84                | hypothetical protein                         |
| 40      | 29028-29564        | -      | 178               | hypothetical protein                         |
| 41      | 29557-29748        | -      | 63                | hypothetical protein                         |
| 42      | 29748-30230        | -      | 160               | hypothetical protein                         |
| 43      | 30249-30518        | -      | 89                | hypothetical protein                         |
| 44      | 30511-30774        | -      | 87                | hypothetical protein                         |
| 45      | 30767-30988        | -      | 73                | molecular chaperone DnaJ                     |
| 46      | 30988-31635        | -      | 215               | RNA-binding protein                          |
| 47      | 31632-32102        | -      | 156               | hypothetical protein                         |

|    |             |   |     |                                        |
|----|-------------|---|-----|----------------------------------------|
| 48 | 32086-32928 | - | 280 | ParB-like protein                      |
| 49 | 32932-33168 | - | 78  | hypothetical protein                   |
| 50 | 33171-33314 | - | 47  | hypothetical protein                   |
| 51 | 33308-33520 | - | 70  | hypothetical protein                   |
| 52 | 33926-34054 | - | 42  | hypothetical protein                   |
| 53 | 34084-34293 | - | 69  | hypothetical protein                   |
| 54 | 34311-34574 | - | 87  | hypothetical protein                   |
| 55 | 35111-35851 | - | 246 | repressor protein C                    |
| 56 | 35950-36198 | + | 82  | XRE-transcriptional regulator Cro-like |
| 57 | 36216-36530 | + | 104 | hypothetical protein                   |
| 58 | 36539-36811 | + | 90  | hypothetical protein                   |
| 59 | 36826-37566 | + | 246 | KilA-N domain-containing protein       |
| 60 | 37556-37738 | + | 60  | DUF4222 domain-containing protein      |
| 61 | 37735-38757 | + | 340 | DNA replication protein O              |
| 62 | 38754-39728 | + | 324 | DUF968 domain-containing protein, HNH  |
| 63 | 39725-40081 | + | 118 | endodeoxyribonuclease RusA             |
| 64 | 40078-40782 | + | 234 | antitermination protein Q              |
| 65 | 41046-41453 | + | 135 | lipoprotein RcsF-like protein          |
| 66 | 41621-41917 | + | 98  | holin                                  |
| 67 | 41919-42449 | + | 176 | lysozyme R                             |
| 68 | 42446-42970 | + | 174 | endopeptidase Rz                       |
| 69 | 42543-42866 | + | 107 | lipoprotein Rz1 precursor              |
| 70 | 43380-43634 | + | 84  | DNA polymerase III theta subunit       |
| 71 | 43631-43771 | + | 46  | hypothetical protein                   |
| 72 | 43813-44457 | + | 214 | hypothetical protein                   |
| 73 | 44482-44727 | + | 81  | hypothetical protein                   |
| 74 | 44706-44930 | + | 74  | hypothetical protein                   |

<sup>a</sup> function was assigned based on proteome analysis

**Table S3.** Genes located within the vB\_SspS\_OS31 phage.

| ORF no. | Coding region (bp) | Protein size (aa) | Strand | Possible function                  |
|---------|--------------------|-------------------|--------|------------------------------------|
| 1       | 263-1660           | 465               | +      | tyrosine integrase                 |
| 2       | 1657-1872          | 71                | -      | excisionase                        |
| 3       | 1887-2456          | 189               | -      | 3'-5' exoribonuclease              |
| 4       | 2532-3065          | 177               | -      | hypothetical protein               |
| 5       | 3141-3674          | 177               | -      | hypothetical protein               |
| 6       | 3690-3908          | 72                | -      | HigB-like protein                  |
| 7       | 3905-4723          | 272               | -      | ParB-like partition protein        |
| 8       | 4817-5626          | 269               | -      | DUF2303 family protein             |
| 9       | 5662-6024          | 120               | -      | hypothetical protein               |
| 10      | 6210-6521          | 103               | +      | hypothetical protein               |
| 11      | 6396-6533          | 45                | -      | hypothetical protein               |
| 12      | 6574-6711          | 45                | -      | hypothetical protein               |
| 13      | 6729-6887          | 52                | -      | DUF1391 family protein             |
| 14      | 7423-8181          | 252               | -      | repressor protein CI               |
| 15      | 8242-8436          | 64                | +      | Cro-like transcriptional regulator |
| 16      | 8513-9022          | 169               | +      | repressor protein CII-like         |
| 17      | 9027-9326          | 99                | +      | hypothetical protein               |
| 18      | 9515-11041         | 508               | +      | DEAD-like helicase                 |
| 19      | 11038-12024        | 328               | +      | DNA primase                        |
| 20      | 12008-12586        | 192               | +      | recombination protein NinG         |

|    |             |      |   |                                             |
|----|-------------|------|---|---------------------------------------------|
| 21 | 12583-13251 | 222  | + | antiterminator Q protein                    |
| 22 | 13288-13461 | 57   | + | hypothetical protein                        |
| 23 | 13602-14138 | 178  | + | hypothetical protein                        |
| 24 | 14138-14632 | 164  | + | hypothetical protein                        |
| 25 | 14864-15892 | 342  | + | DNA adenine methyltransferase               |
| 26 | 15973-16314 | 113  | + | holin                                       |
| 27 | 16301-16735 | 144  | + | lysozyme R                                  |
| 28 | 16732-17271 | 179  | + | endopeptidase Rz                            |
| 29 | 16838-17161 | 107  | + | lipoprotein Rz1 precursor                   |
| 30 | 17268-17480 | 70   | + | hypothetical protein                        |
| 31 | 17501-17698 | 65   | + | hypothetical protein                        |
| 32 | 17805-18050 | 81   | + | hypothetical protein                        |
| 33 | 18110-18406 | 98   | + | hypothetical protein                        |
| 34 | 18403-18741 | 112  | + | HNH endonuclease                            |
| 35 | 18741-18941 | 66   | + | hypothetical protein                        |
| 36 | 19160-19624 | 154  | + | terminase small subunit                     |
| 37 | 19644-21314 | 556  | + | terminase large subunit                     |
| 38 | 21314-22582 | 422  | + | portal protein                              |
| 39 | 22600-23280 | 226  | + | prohead protease                            |
| 40 | 23282-24445 | 387  | + | major capsid protein                        |
| 41 | 24488-24814 | 108  | + | head-tail connector protein                 |
| 42 | 24814-25140 | 108  | + | head closure protein                        |
| 43 | 25137-25553 | 138  | + | tail protein                                |
| 44 | 25550-25897 | 115  | + | DUF3160 domain-containing protein           |
| 45 | 25941-26873 | 310  | - | IS3-like element IS150 family transposase B |
| 46 | 26798-27310 | 171  | - | IS3-like element IS150 family transposase A |
| 47 | 27396-28118 | 240  | + | major tail subunit                          |
| 48 | 28136-28558 | 140  | + | assembly chaperone                          |
| 49 | 28555-28845 | 96   | + | DUF 4035 domain-containing protein          |
| 50 | 28878-32240 | 1120 | + | tail tape measure protein                   |
| 51 | 32237-32590 | 117  | + | tail minor protein                          |
| 52 | 32599-33351 | 250  | + | tail tip protein L                          |
| 53 | 33354-34055 | 233  | + | tail tip protein K                          |
| 54 | 34099-34437 | 112  | + | phage protein                               |
| 55 | 34476-35090 | 204  | + | tail assembly protein I                     |
| 56 | 35151-38498 | 1115 | + | tail tip protein, host specificity J        |
| 57 | 38538-40817 | 759  | + | tail fiber protein                          |
| 58 | 40810-41577 | 255  | + | hypothetical protein                        |
| 59 | 41600-41839 | 79   | - | hypothetical protein                        |
| 60 | 41839-42081 | 80   | - | DinI family protein                         |

**Table S4.** The comparison of vB\_SspM\_BZS1 and vB\_SspS\_OS31 phage-encoded proteins with *Serratia* phages using protein BLAST (1e-10 e-value threshold).

| Query               | Predicted function                   | Phage/protein Acc no. | % ident | E-value  | Coverage % |
|---------------------|--------------------------------------|-----------------------|---------|----------|------------|
| PhiBZS1_p02         | terminase large subunit              | JS26, QGF20868.1      | 25,404  | 3,15E-18 | 58         |
| JS26, QGF20868.1    | terminase large subunit              | PhiBZS1_p02           |         | 2,64E-18 | 75         |
| PhiBZS1_p04         | phage portal protein                 | JS26, QGF20866.1      | 30,577  | 5,63E-73 | 95         |
| JS26, QGF20866.1    | hypothetical protein                 | PhiBZS1_p04           |         | 6,07E-73 | 91         |
| PhiBZS1_p05         | head-tail preconnector protease      | JS26, QGF20871.1      | 33,099  | 6,40E-48 | 95         |
| JS26, QGF20871.1    | hypothetical protein                 | PhiBZS1_p05           |         | 6,70E-34 | 64         |
| PhiBZS1_p08         | major capsid protein                 | JS26, QGF20877.1      | 28,797  | 4,42E-30 | 86         |
| JS26, QGF20877.1    | hypothetical protein                 | PhiBZS1_p08           |         | 4,48E-30 | 84         |
| PhiBZS1_p35         | HigB-like protein                    | PhiOS31_p06           | 37,097  | 7,53E-12 | 90         |
| PhiOS31_p06         | HigB-like protein                    | PhiBZS1_p35           |         |          | 86         |
| PhiBZS1_p038        | hypothetical protein                 | Parlo, QBQ72186.1     | 88,976  | 1,91E-83 | 55         |
| Parlo, QBQ72186.1   | hypothetical protein                 | PhiBZS1_p38           |         | 2,00E-83 | 52         |
| PhiBZS1_p45         | molecular chaperone DnaJ             | Parlo, QBQ72187.1     | 75      | 1,83E-29 | 77         |
| Parlo, QBQ72187.1   | molecular chaperone                  | PhiBZS1_p45           |         | 1,78E-29 | 79         |
| PhiBZS1_p46         | RNA-binding protein                  | Eta, YP_008130315.1   | 47,257  | 1,38E-53 | 99         |
| Eta, YP_008130315.1 | hypothetical protein                 | PhiBZS1_p46           |         | 1,46E-53 | 97         |
| PhiBZS1_p48         | ParB-like partitioning protein       | Eta,YP_008130295.1    | 55,474  | 7,9E-102 | 95         |
| Eta,YP_008130295.1  | putative parB-like partition protein | PhiBZS1_p48           |         | 1,18E-89 | 99         |
| PhiBZS1_p48         | ParB-like partitioning protein       | PhiOS31_p07           | 35,484  | 5,01E-44 | 89         |
| PhiOS31_p07         | ParB-like partitioning protein       | PhiBZS1_p48           |         | 2,82E-37 | 90         |
| PhiBZS1_p49         | hypothetical protein                 | Parlo, QBQ72162.1     | 69,014  | 1,24E-32 | 88         |
| Parlo, QBQ72162.1   | hypothetical protein                 | PhiBZS1_p49           |         | 1,16E-32 | 97         |
| PhiBZS1_p68         | endopeptidase Rz                     | PhiOS31_p28           | 77,108  | 1,15E-93 | 95         |
| PhiOS31_p28         | endopeptidase Rz                     | PhiBZS1_p68           |         | 1,18E-93 | 93         |
| PhiOS31_p07         | ParB-like partitioning protein       | Eta, YP_008130295.1   | 31,474  |          | 88         |
| Eta, YP_008130295.1 | putative parB-like partition protein | PhiOS31_p07           |         | 1,11E-26 | 90         |
| PhiOS31_p17         | hypothetical protein                 | Eta, YP_008130291.1   | 41,791  | 9,88E-15 | 68         |
| Eta, YP_008130291.1 | hypothetical protein                 | PhiOS31_p17           |         | 8,38E-15 | 80         |
| PhiOS31_p18         | DEAD-like helicase                   | Eta, YP_008130293.1   | 23,81   | 1,18E-17 | 77         |
| Eta, YP_008130293.1 | putative helicase                    | PhiOS31_p18           | 23,853  | 1,52E-17 | 62         |
| PhiOS31_p18         | DEAD-like helicase                   | PS2, YP_009030245.1   | 23,1    | 3,60E-12 | 61         |
| PS2, YP_009030245.1 | putative split helicase              | PhiOS31_p18           |         | 3,53E-12 | 64         |
| PhiOS31_p27         | lysozyme R                           | Eta, YP_008130340.1   | 51,007  | 5,07E-46 | 100        |
| Eta, YP_008130340.1 | lysin                                | PhiOS31_p27           |         | 5,28E-46 | 99         |
| PhiOS31_p51         | tail minor protein                   | Scapp, AXH50962.1     | 40,4    | 1,20E-57 | 96         |
| Scapp, AXH50962.1   | putative minor tail protein          | PhiOS31_p51           |         | 1,23E-57 | 96         |
| PhiOS31_p52         | tail tip protein L                   | Scapp, AXH50963.1     | 40      | 1,12E-50 | 98         |
| Scapp, AXH50963.1   | putative minor tail protein          | PhiOS31_p52           |         | 1,19E-50 | 92         |
| PhiOS31_p54         | phage protein                        | Scapp, AXH50964.1     | 43,455  | 7,61E-52 | 94         |
| Scapp, AXH50964.1   | putative minor tail protein          | PhiOS31_p54           | 44,792  | 5,91E-49 | 97         |
| PhiOS31_p55         | tail assembly protein I              | Scapp, AXH50965.1     | 38,046  | 0        | 86         |
| Scapp, AXH50965.1   | putative tail tip fiber protein      | PhiOS31_p55           |         | 0        | 87         |
| PhiOS31_p57         | tail fibre/acetyltransferase         | Serbin, QBQ72942.1    | 33,291  | 5,5E-107 | 99         |
| Serbin, QBQ72942.1  | putative tail fiber protein          | PhiOS31_p57           | 32,997  | 1,4E-100 | 99         |
| PhiOS31_p57         | tail fibre/acetyltransferase         | PhiBZS1_p27           | 32,824  | 4,46E-11 | 16         |

**Table S5.** vConTACT-based neighbors of vB\_SspM\_BZS1 and vB\_SspS\_OS31 phages. The table shows the results of proteome-based phages clustering and the resulting assignment of viral clusters and status.

| vB_SspM_BZS1 neighbor nodes |                        |                         |                                           |                                                             |                         |             |
|-----------------------------|------------------------|-------------------------|-------------------------------------------|-------------------------------------------------------------|-------------------------|-------------|
| Family                      | vConTACT viral cluster | vConTACT status         | Phage name                                | Host name                                                   | Genome accession number | Reference   |
| <i>Myoviridae</i>           | 194_0                  | Clustered               | <i>Enterobacteria</i> phage phiP27        | <i>Escherichia coli</i> ONT:H- strain 2771/97               | AJ298298.1              | [21]        |
| <i>Myoviridae</i>           | -                      | Outlier                 | <i>Enterobacteria</i> phage SfI           | <i>Shigella flexneri</i> serotype 1a strain 019             | JX509734.1              | [22]        |
| <i>Myoviridae</i>           | 194_0                  | Clustered               | <i>Enterobacteria</i> phage SfV           | <i>Shigella flexneri</i>                                    | U82619.2                | [23]        |
| <i>Myoviridae</i>           | 194_0                  | Clustered               | <i>Yersinia</i> phage YeP2                | <i>Yersinia enterocolitica</i> BJ2014-1008297168            | MK733260.1              | unpublished |
| <i>Myoviridae</i>           | 194_0                  | Clustered               | <i>Yersinia</i> phage YeP3                | <i>Yersinia enterocolitica</i> QH2012-y91                   | MK733261.1              | unpublished |
| <i>Myoviridae</i>           | 194_0                  | Clustered               | <i>Yersinia</i> phage YeP1                | <i>Yersinia enterocolitica</i> BJ2014-1008329276            | MK733259.1              | unpublished |
| <i>Myoviridae</i>           | -                      | Overlap (VC_379/VC_385) | <i>Escherichia</i> phage 1720a-02         | <i>Escherichia coli</i> strain O174:H21 isolate 1720a       | KF030445.1              | unpublished |
| <i>Myoviridae</i>           | -                      | Outlier                 | <i>Pseudomonas</i> phage DVM-2008         | <i>Pseudomonas fluorescens</i> Q8r1-96                      | EU982300.1              | [24]        |
| <i>Myoviridae</i>           | 30_0                   | Clustered               | <i>Klebsiella</i> phage ST15-VIM1phi2.1   | <i>Klebsiella pneumoniae</i> ST15-VIM1                      | MK448228.1              | unpublished |
| <i>Myoviridae</i>           | -                      | Outlier                 | Phage NV21                                | unkown; viral metagenome                                    | MK047641.1              | unpublished |
| <i>Myoviridae</i>           | -                      | Outlier                 | <i>Pectobacterium</i> phage ZF40          | <i>Pectobacterium carotovorum</i>                           | JQ177065.1              | [25]        |
| <i>Myoviridae</i>           | 194_0                  | Clustered               | <i>Salmonella</i> phage 118970_sal3       | <i>Salmonella enterica</i>                                  | KU927493.2              | [26]        |
| <i>Myoviridae</i>           | 194_0                  | Clustered               | <i>Salmonella</i> phage ST64B             | <i>Salmonella enterica</i> subsp. enterica ser. Typhimurium | AY055382.1              | [27]        |
| <i>Myoviridae</i>           | 194_0                  | Clustered               | <i>Shigella</i> phage SfII                | <i>Shigella flexneri</i> Serotype 2a                        | KC736978.1              | [28]        |
| <i>Myoviridae</i>           | 194_0                  | Clustered               | <i>Shigella</i> phage SfIV                | <i>Shigella flexneri</i> serotype 4av                       | KC814930.1              | [29]        |
| <i>Siphoviridae</i>         | 75_1                   | Clustered               | <i>Klebsiella</i> phage ST13-OXA48phi12.5 | <i>Klebsiella pneumoniae</i> ST13-OXA48                     | MK714353.1              | unpublished |
| <i>Myoviridae</i>           | -                      | Outlier                 | vB_SspM_BZS1                              | <i>Serratia</i> sp. OS31                                    | MT843275                | This work   |
| vB_SspS_OS31 neighbor nodes |                        |                         |                                           |                                                             |                         |             |
| Family                      | vConTACT viral cluster | vConTACT status         | Phage name                                | Host name                                                   | Genome accession number | References  |
| <i>Siphoviridae</i>         | -                      | Overlap (VC_194/VC_247) | <i>Escherichia</i> virus HK022            | <i>Escherichia coli</i> K12                                 | AF069308.1              | [30]        |
| <i>Siphoviridae</i>         | 245_0                  | Clustered               | <i>Burkholderia</i> virus phiE125         | <i>Burkholderia thailandensis</i> E125                      | AF447491.1              | [31]        |
| <i>Siphoviridae</i>         | 282_1                  | Clustered               | <i>Enterobacteria</i> phage BP-4795       | <i>Escherichia coli</i> , strain 4795/97, serotype O84:H4   | AJ556162.1              | [32]        |
| <i>Siphoviridae</i>         | 245_0                  | Clustered               | <i>Burkholderia</i> virus phi1026b        | <i>Burkholderia pseudomallei</i> 1026b                      | AY453853.1              | [33]        |
| <i>Siphoviridae</i>         | -                      | Overlap (VC_279/VC_378) | <i>Klebsiella</i> phage phiKO2            | <i>Klebsiella oxytoca</i>                                   | AY374448.1              | [34]        |



|                     |       |                                   |                                      |                                                 |            |             |
|---------------------|-------|-----------------------------------|--------------------------------------|-------------------------------------------------|------------|-------------|
| <i>Siphoviridae</i> | -     | Overlap<br>(VC_194/VC_247/VC_283) | <i>Escherichia</i> virus HK97        | <i>Escherichia coli</i> K12                     | AF069529.1 | [30]        |
| <i>Siphoviridae</i> | -     | Outlier                           | <i>Burkholderia</i> phage Bcep176    | <i>Burkholderia cepacia</i>                     | DQ203855.1 | unpublished |
| <i>Siphoviridae</i> | 282_1 | Clustered                         | Stx2-converting phage 1717           | <i>Escherichia coli</i> O157:H7                 | FJ188381.1 | [35]        |
| <i>Siphoviridae</i> | 282_1 | Clustered                         | <i>Enterobacteria</i> phage YYZ-2008 | <i>Escherichia coli</i> EC970520 O157:H7        | FJ184280.1 | unpublished |
| <i>Siphoviridae</i> | -     | Outlier                           | <i>Burkholderia</i> phage KS9        | <i>Burkholderia pyrrocinia</i> strain LMG 21824 | FJ982340.1 | [36]        |
| <i>Siphoviridae</i> | 245_0 | Clustered                         | <i>Burkholderia</i> virus phi6442    | <i>Burkholderia pseudomallei</i>                | CP000625.2 | unpublished |
| <i>Siphoviridae</i> | -     | Outlier                           | <i>Escherichia</i> phage HK639       | <i>Escherichia coli</i>                         | HM208537.1 | unpublished |
| <i>Siphoviridae</i> | -     | Overlap<br>(VC_194/VC_247/VC_283) | <i>Escherichia</i> phage HK75        | <i>Escherichia coli</i> K-12                    | HM173637.1 | unpublished |
| <i>Siphoviridae</i> | -     | Outlier                           | <i>Cronobacter</i> phage phiES15     | <i>Cronobacte sakazakii</i> ES15                | JQ780327.1 | [37]        |
| <i>Siphoviridae</i> | -     | Overlap<br>(VC_194/VC_247/VC_283) | <i>Enterobacteria</i> phage HK140    | <i>Escherichia coli</i>                         | JQ086370.1 | unpublished |
| <i>Siphoviridae</i> | -     | Overlap<br>(VC_194/VC_247/VC_283) | <i>Enterobacteria</i> phage HK633    | <i>Escherichia coli</i>                         | JQ086377.1 | unpublished |
| <i>Siphoviridae</i> | -     | Overlap<br>(VC_377/VC_379/VC_385) | <i>Enterobacteria</i> phage mEp237   | <i>Escherichia coli</i>                         | JQ182730.1 | unpublished |
| <i>Siphoviridae</i> | -     | Overlap<br>(VC_194/VC_247/VC_283) | <i>Enterobacteria</i> phage HK542    | <i>Escherichia coli</i>                         | JQ086373.1 | unpublished |
| <i>Siphoviridae</i> | -     | Overlap<br>(VC_194/VC_247/VC_283) | <i>Enterobacteria</i> phage HK446    | <i>Escherichia coli</i>                         | JQ086372.1 | unpublished |
| <i>Siphoviridae</i> | -     | Overlap<br>(VC_194/VC_247/VC_283) | <i>Enterobacteria</i> phage mEpX1    | <i>Escherichia coli</i>                         | JQ182727.1 | unpublished |
| <i>Siphoviridae</i> | -     | Overlap<br>(VC_194/VC_247/VC_283) | <i>Enterobacterial</i> phage mEp234  | <i>Escherichia coli</i>                         | JQ182732.1 | unpublished |
| <i>Siphoviridae</i> | -     | Overlap<br>(VC_377/VC_379/VC_385) | <i>Enterobacteria</i> phage HK225    | <i>Escherichia coli</i>                         | JQ086371.1 | unpublished |
| <i>Siphoviridae</i> | -     | Overlap<br>(VC_194/VC_247/VC_283) | <i>Enterobacteria</i> phage HK544    | <i>Escherichia coli</i>                         | JQ086374.1 | unpublished |
| <i>Siphoviridae</i> | -     | Overlap<br>(VC_194/VC_247/VC_283) | <i>Enterobacteria</i> phage mEp235   | <i>Escherichia coli</i>                         | JQ182731.1 | unpublished |
| <i>Siphoviridae</i> | -     | Overlap<br>(VC_194/VC_247/VC_283) | <i>Enterobacteria</i> phage mEpX2    | <i>Escherichia coli</i>                         | JQ182726.1 | unpublished |
| <i>Siphoviridae</i> | 196_0 | Clustered                         | <i>Enterobacterial</i> phage mEp390  | <i>Escherichia coli</i>                         | JQ182729.1 | unpublished |
| <i>Siphoviridae</i> | -     | Overlap<br>(VC_194/VC_247/VC_283) | <i>Enterobacteria</i> phage HK106    | <i>Escherichia coli</i>                         | JQ086369.1 | unpublished |
| <i>Siphoviridae</i> | 196_0 | Clustered                         | <i>Cronobacter</i> phage ENT39118    | <i>Cronobacter sakazakii</i>                    | HQ201307.1 | [38]        |
| <i>Siphoviridae</i> | 282_1 | Clustered                         | <i>Enterobacteria</i> phage 2851     | <i>Escherichia coli</i> O157:H7 strain CB2851   | FM180578.1 | [39]        |

|                     |       |                                   |                                            |                                                         |            |             |
|---------------------|-------|-----------------------------------|--------------------------------------------|---------------------------------------------------------|------------|-------------|
| <i>Siphoviridae</i> | 282_1 | Clustered                         | Stx2-converting phage Stx2a_F349           | <i>Escherichia coli</i> O157:H7 strain F349             | AP012530.1 | [40]        |
| <i>Siphoviridae</i> | 282_0 | Clustered                         | Stx2-converting phage Stx2a_1447           | <i>Escherichia coli</i> O157:H7 strain 1447             | AP012536.1 | [40]        |
| <i>Siphoviridae</i> | 282_0 | Clustered                         | Stx2-converting phage Stx2a_WGPS2          | <i>Escherichia coli</i> O157:H7 strain 980938           | AP012537.1 | [40]        |
| <i>Siphoviridae</i> | 282_1 | Clustered                         | Stx2-converting phage Stx2a_WGPS4          | <i>Escherichia coli</i> O157:H7 strain 990281           | AP012538.1 | [40]        |
| <i>Siphoviridae</i> | 282_1 | Clustered                         | Stx2-converting phage Stx2a_WGPS6          | <i>Escherichia coli</i> O157:H7 strain 990570           | AP012539.1 | [40]        |
| <i>Siphoviridae</i> | 282_1 | Clustered                         | Stx2-converting phage Stx2a_WGPS8          | <i>Escherichia coli</i> O157:H7 strain 982243           | AP012540.1 | [40]        |
| <i>Siphoviridae</i> | 196_0 | Clustered                         | <i>Klebsiella</i> phage 1 LV-2017          | <i>Klebsiella pneumoniae</i> KH43                       | KY271401.1 | [41]        |
| <i>Siphoviridae</i> | 196_0 | Clustered                         | <i>Morganella</i> phage IME1369_02         | <i>Morganella morganii</i> IME1369                      | KY653119.1 | unpublished |
| <i>Siphoviridae</i> | -     | Overlap<br>(VC_194/VC_247/VC_283) | <i>Escherichia</i> phage ECP1              | <i>Escherichia coli</i> MG1655                          | KY979108.1 | unpublished |
| <i>Siphoviridae</i> | 282_1 | Clustered                         | <i>Escherichia</i> phage JLK-2012          | <i>Escherichia coli</i> O55:H7 str. DEC5E               | JQ347801.1 | [42]        |
| <i>Siphoviridae</i> | 196_0 | Clustered                         | <i>Escherichia</i> phage phi467            | <i>Escherichia coli</i> strain EF467                    | LN997803.1 | unpublished |
| <i>Siphoviridae</i> | -     | Outlier                           | <i>Salmonella</i> phage FSL SP-016         | <i>Salmonella enterica</i>                              | KC139516.1 | [43]        |
| <i>Siphoviridae</i> | 196_0 | Clustered                         | <i>Aeromonas</i> phage AsXd-1              | <i>Aeromonas salmonicida</i>                            | MH178096.1 | [44]        |
| <i>Siphoviridae</i> | -     | Outlier                           | <i>Escherichia</i> phage PHB10             | <i>Escherichia coli</i>                                 | MK524177.1 | [45]        |
| <i>Siphoviridae</i> | 196_0 | Clustered                         | <i>Klebsiella</i> phage ST13-OXA48phi12.2  | <i>Klebsiella pneumoniae</i> ST13-OXA48                 | MK422452.1 | [46]        |
| <i>Siphoviridae</i> | 196_0 | Clustered                         | <i>Klebsiella</i> phage ST899-OXA48phi17.2 | <i>Klebsiella pneumoniae</i> ST899-OXA48                | MK433583.1 | [46]        |
| <i>Siphoviridae</i> | 196_0 | Clustered                         | <i>Klebsiella</i> phage ST147-VIM1phi7.2   | <i>Klebsiella pneumoniae</i> ST147-VIM1                 | MK448232.1 | [46]        |
| <i>Siphoviridae</i> | -     | Overlap (VC_43/VC_197)            | <i>Klebsiella</i> phage ST13-OXA48phi12.4  | <i>Klebsiella pneumoniae</i> ST13-OXA48                 | MK422450.1 | [46]        |
| <i>Siphoviridae</i> | 196_0 | Clustered                         | <i>Klebsiella</i> phage ST101-KPC2phi6.3   | <i>Klebsiella pneumoniae</i> ST101-KPC2                 | MK416017.1 | [46]        |
| <i>Siphoviridae</i> | -     | Outlier                           | <i>Bordetella</i> phage vB_BbrS_PHB09      | <i>Bordetella bronchiseptica</i> Bb01                   | MN103401.1 | [47]        |
| <i>Siphoviridae</i> | 196_0 | Clustered                         | <i>Enterobacter</i> phage LAU1             | <i>Enterobacter hormaechei</i> subsp.<br>xiangfangensis | MN688132.1 | unpublished |
| <i>Siphoviridae</i> | 196_0 | Clustered                         | vB_SspS_OS31                               | <i>Serratia</i> sp. OS31                                | MT843276   | This work   |

**Table S6. The comparison of vB\_SspS\_OS31 proteins with other phages.** The comparison was based on BLASTP searches with e-value  $\leq 1e-15$  and query coverage of HSP  $\geq 75\%$ . Results above the thresholds were marked as significantly similar and the cell in the table was marked with a number (1), otherwise the cell was left empty.

| vB_SspS_OS31                                     | HQ201307.1 | JQ182729.1 | KY271401.1 | KY653119.1 | LN997803.1 | MH178096.1 | MK416017.1 | MK422452.1 | MK433583.1 | MK448232.1 | MN688132.1 | Total amount |
|--------------------------------------------------|------------|------------|------------|------------|------------|------------|------------|------------|------------|------------|------------|--------------|
| PhiOS31_p03 3'-5' exoribonuclease                |            |            |            | 1          |            |            |            | 1          |            |            |            | 2            |
| PhiOS31_p06 HigB-like protein                    |            |            |            |            |            | 1          |            |            |            |            |            | 1            |
| PhiOS31_p07 ParB-like partition protein          |            | 1          |            |            |            |            |            | 1          |            |            |            | 2            |
| PhiOS31_p08 DUF2303 family protein               |            |            |            |            |            |            |            | 1          |            |            |            | 1            |
| PhiOS31_p09 hypothetical protein                 |            |            |            |            |            |            |            | 1          |            |            |            | 1            |
| PhiOS31_p14 repressor protein CI                 | 1          | 1          |            | 1          |            |            | 1          | 1          |            |            |            | 5            |
| PhiOS31_p17 hypothetical protein                 |            |            |            |            | 1          |            |            |            |            |            |            | 1            |
| PhiOS31_p18 DEAD-like helicase                   | 1          |            |            |            | 1          |            |            | 1          |            |            |            | 3            |
| PhiOS31_p19 DNA primase                          | 1          |            |            |            | 1          |            |            | 1          |            |            |            | 3            |
| PhiOS31_p25 DNA adenine methyltransferase        |            |            |            | 1          |            |            |            |            |            |            |            | 1            |
| PhiOS31_p27 lysozyme R                           |            |            |            | 1          | 1          |            |            |            |            |            |            | 2            |
| PhiOS31_p34 HNH endonuclease                     | 1          | 1          |            |            |            | 1          |            |            | 1          | 1          |            | 5            |
| PhiOS31_p36 terminase small subunit              |            |            | 1          | 1          | 1          |            |            | 1          | 1          | 1          |            | 6            |
| PhiOS31_p37 terminase large subunit              | 1          | 1          | 1          | 1          | 1          | 1          | 1          | 1          | 1          | 1          | 1          | 11           |
| PhiOS31_p38 portal protein                       | 1          | 1          | 1          | 1          | 1          | 1          | 1          | 1          | 1          | 1          | 1          | 11           |
| PhiOS31_p39 prohead protease                     | 1          | 1          |            |            | 1          | 1          | 1          |            |            |            | 1          | 6            |
| PhiOS31_p40 major capsid protein                 | 1          | 1          |            |            |            | 1          |            |            | 1          | 1          | 1          | 6            |
| PhiOS31_p41 head-tail connector protein          | 1          | 1          |            |            |            | 1          |            |            |            |            | 1          | 4            |
| PhiOS31_p42 head closure protein                 | 1          | 1          | 1          | 1          | 1          | 1          | 1          | 1          | 1          | 1          | 1          | 11           |
| PhiOS31_p43 tail protein                         | 1          | 1          | 1          | 1          |            | 1          | 1          | 1          | 1          | 1          | 1          | 10           |
| PhiOS31_p44 DUF3160 domain-containing protein    | 1          | 1          |            | 1          | 1          | 1          | 1          | 1          | 1          | 1          | 1          | 10           |
| PhiOS31_p48 assembly chaperone                   | 1          | 1          | 1          | 1          | 1          | 1          | 1          | 1          | 1          | 1          | 1          | 11           |
| PhiOS31_p49 DUF 4035 domain-containing protein   |            | 1          | 1          | 1          | 1          | 1          | 1          | 1          | 1          | 1          | 1          | 10           |
| PhiOS31_p50 tail tape measure protein            | 1          | 1          |            |            | 1          |            |            |            |            |            |            | 3            |
| PhiOS31_p51 tail minor protein                   |            | 1          |            | 1          |            | 1          |            |            |            |            | 1          | 4            |
| PhiOS31_p52 tail tip protein L                   | 1          | 1          |            | 1          | 1          | 1          |            |            |            |            | 1          | 6            |
| PhiOS31_p53 tail tip protein K                   | 1          | 1          |            | 1          |            | 1          |            |            |            |            | 1          | 5            |
| PhiOS31_p55 tail assembly protein I              | 1          | 1          |            | 1          |            | 1          |            |            |            |            | 1          | 5            |
| PhiOS31_p56 tail tip protein, host specificity J |            | 1          |            | 1          |            | 1          |            |            |            |            | 1          | 4            |
| PhiOS31_p60 DinI family protein                  |            | 1          |            |            |            | 1          |            |            |            |            |            | 2            |
| Total amount                                     | 17         | 20         | 7          | 17         | 14         | 18         | 9          | 15         | 10         | 10         | 15         | 152          |

**Table S7.** Prophages identified within bacterial genomes similar to vB\_SspM\_BZS1 and vB\_SspS\_OS31 (minimum query coverage 24% threshold). When the nucleotide sequence of a prophage predicted by us, overlapped the prophage regions determined by authors of publications appropriate coordinates were introduced in the References column.

| Host                                      | Genome acc. no (coordinates)   | Family              | Size (bp) | GC % | CDS | Integration site                                                                                                                                                   | Query Coverage, identities                | References              |
|-------------------------------------------|--------------------------------|---------------------|-----------|------|-----|--------------------------------------------------------------------------------------------------------------------------------------------------------------------|-------------------------------------------|-------------------------|
| <b>Prophages similar to BZS1</b>          |                                |                     |           |      |     |                                                                                                                                                                    |                                           |                         |
| <i>Pectobacterium parmentieri</i> IFB5605 | CP026984.1 (1406812-1449822)   | <i>Myoviridae</i>   | 43011     | 47.8 | 56  | tRNA-Arg(tct)<br>ATGGTACGCCCTACAGGGCTCGAACCT<br>GTGACCTACGGCTTAGAAG                                                                                                | Query Coverage: 37%<br>Identities: 75%    | [48], 1393802 - 1457622 |
| <i>Serratia marcescens</i> 4201           | CP047679.1 (1216827-1261080)   | <i>Myoviridae</i>   | 44254     | 52.1 | 60  | TTCCAGTTACGAA                                                                                                                                                      | Query Coverage: 48%<br>Identities: 81%    | Unpublished             |
| <i>Serratia marcescens</i> EL1            | CP027796.1 (5072061-5116746)   | <i>Myoviridae</i>   | 44868     | 52.0 | 59  | tRNA-Leu(taa)<br>ATTTAAAATCCCTCGGCTTATGGCTGTG<br>CGGGTTCAAGTCCCGCCCCGGGTACCA<br>GGGAACAAAAATACCGAATAATCAAA<br>GCAATAAGTAGTAATGTCGTAGACCGC<br>CGAGAGGCGGTTTTTTTGTTT | Query Coverage: 51%<br>Identities: 82,4%  | Unpublished             |
| <i>Serratia marcescens</i> KS10           | CP027798.1 (2825136-2869821)   | <i>Myoviridae</i>   | 45686     | 52.0 | 59  | tRNA-Leu(taa)<br>ATTTAAAATCCCTCGGCTTATGGCTGTG<br>CGGGTTCAAGTCCCGCCCCGGGTACCA<br>GGGAACAAAAATACCGAATAATCAAA<br>GCAATAAGTAGTAATGTCGTAGACCGC<br>CGAGAGGCGGTTTTTTTGTTT | Query Coverage: 51%<br>Identities: 82,41% | Unpublished             |
| <i>Serratia marcescens</i> SmUNAM836      | CP012685.1 (3321604-3366650)   | <i>Myoviridae</i>   | 45047     | 52.3 | 56  | ferredoxin-like protein YfhL<br>GCTCGCACATGTCGCAGTTGAT                                                                                                             | Query Coverage: 52%<br>Identities: 82,44% | [49], 3321802-3366386   |
| <i>Serratia marcescens</i> WVU-001        | CP041122.1 (1032870-1079228)   | <i>Myoviridae</i>   | 46359     | 52.0 | 64  | CATCAGACTGTTTCTCTGATGCT                                                                                                                                            | Query Coverage: 50%<br>Identities: 81,84% | Unpublished             |
| <i>Serratia marcescens</i> WVU-003        | CP041124.1 (1032870-1079228)   | <i>Myoviridae</i>   | 46359     | 52.0 | 64  | CATCAGACTGTTTCTCTGATGCT                                                                                                                                            | Query Coverage: 50%<br>Identities: 81,84% | Unpublished             |
| <i>Serratia</i> sp. 1D1416 pp1            | CP032738.1 (4585981-4632239)   | <i>Myoviridae</i>   | 46259     | 52.7 | 69  | AAAAAAGCCCCGGCAAAACGCCGG                                                                                                                                           | Query Coverage: 49%<br>Identities: 86,3%  | [50]                    |
| <i>Escherichia coli</i> CV839-15          | CP024978.1 (4348878 – 4394136) | <i>Myoviridae</i>   | 45259     | 52.1 | 65  | DUF72 domain-containing protein<br>CACGCAGTTAAAGTGGCGGGC                                                                                                           | Query Coverage: 34%<br>Identities: 70,92% | [51]                    |
| <b>Prophages similar to OS31</b>          |                                |                     |           |      |     |                                                                                                                                                                    |                                           |                         |
| <i>Serratia liquefaciens</i> ATCC 27592   | CP006252.1 (3958703-4001776)   | <i>Siphoviridae</i> | 43074     | 49.3 | 52  | ferredoxin-like protein YfhL<br>TCGCACATGTCGCAGTTGATGCA                                                                                                            | Query Coverage: 47%<br>Identities: 93,29% | [52]                    |
| <i>Serratia liquefaciens</i> FG3          | CP033893.1 (4127044-4168355)   | <i>Siphoviridae</i> | 41312     | 52.4 | 55  | protein EttA<br>GGTATAGACGTATTGAGCCACGGTGCT<br>CTA                                                                                                                 | Query Coverage: 44%<br>Identities: 92,28% | [53]                    |
| <i>Serratia liquefaciens</i> JL02         | CP048043.1 (4016455-4068130)   | <i>Siphoviridae</i> | 51676     | 51.0 | 58  | TTGCGGGCTTTTTGTGTCTGTAG                                                                                                                                            | Query Coverage: 47%<br>Identities: 93,37% | Unpublished             |
| <i>Serratia liquefaciens</i> S1           | CP048784.1 (4015813-4058542)   | <i>Siphoviridae</i> | 42730     | 49.9 | 50  | ferredoxin-like protein YfhL<br>TCGCACATGTCGCAGTTGAT                                                                                                               | Query Coverage: 45%<br>Identities: 93%    | [54]                    |
| <i>Serratia marcescens</i> AR_0091        | CP027533.1 (3057431-3099123)   | <i>Siphoviridae</i> | 41693     | 52.2 | 53  | GTAATCGTGAATGTA                                                                                                                                                    | Query Coverage: 41%<br>Identities: 83,7%  | Unpublished             |

|                                           |                              |                     |       |      |    |                                                                     |                                           |                            |
|-------------------------------------------|------------------------------|---------------------|-------|------|----|---------------------------------------------------------------------|-------------------------------------------|----------------------------|
| <i>Serratia marcescens</i> AR_0130        | CP028947.1 (3408429-3448305) | <i>Myoviridae</i>   | 39877 | 51.0 | 54 | GTAATCGTGAATGTA                                                     | Query Coverage: 24%<br>Identities: 83,78% | Unpublished                |
| <i>Serratia marcescens</i> AS1            | CP010584.1 (1760327-1802678) | <i>Siphoviridae</i> | 42352 | 52.4 | 49 | ferredoxin-like protein<br>YfhL CGCACATGTCGCAGTTGAT                 | Query Coverage: 36%<br>Identities: 84,7%  | [55]                       |
| <i>Serratia marcescens</i> B3R3           | CP013046.2 (3636385-3679019) | <i>Siphoviridae</i> | 42640 | 52.3 | 58 | GTAATCGTGAATGTA                                                     | Query Coverage: 37%<br>Identities: 84,63% | Unpublished                |
| <i>Serratia marcescens</i><br>FDAARGOS_65 | CP026050.1 (4195148-4236021) | <i>Myoviridae</i>   | 40874 | 52.8 | 50 | ferredoxin-like protein YfhL<br>TCGCACATATCGCAGTTGATGCA             | Query Coverage: 29%<br>Identities: 83,59% | Unpublished                |
| <i>Serratia marcescens</i><br>SmUNAM836   | CP012685.1 (3321604-3366650) | <i>Myoviridae</i>   | 45047 | 52.3 | 56 | ferredoxin-like protein YfhL<br>GCTCGCACATGTCGCAGTTGAT              | Query Coverage: 29%<br>Identities: 84,92% | 3321802-3366386            |
| <i>Serratia plymuthica</i> 4Rx13          | CP006250.1 (4060625-4104885) | <i>Siphoviridae</i> | 44281 | 49.4 | 44 | ferredoxin-like protein YfhL<br>GCTCGCACATATCGCAGTTGATGCA           | Query Coverage: 60%<br>Identities: 88,41% | [56], 4060600 –<br>4104861 |
| <i>Serratia quinivorans</i> PKL12         | CP038467.1 (4692222-4730406) | <i>Siphoviridae</i> | 38185 | 52.1 | 53 | tRNA-Gly(tcc)<br>TGGTGGAGCTGGGGGATTGAACCC                           | Query Coverage: 53%<br>Identities: 95,33% | Unpublished                |
| <i>Serratia</i> sp. 1D1416 pp2            | CP032738.1 (2691003-2735611) | <i>Siphoviridae</i> | 44609 | 51.6 | 55 | tRNA-Arg(tct)<br>TGGTACGCCCTACAGGGCTCGAACCTG<br>TGACCTACGGCTTAGAAGG | Query Coverage: 38%<br>Identities: 86,13% | [50]                       |
| <i>Serratia</i> sp. JKS000199             | LT907843.1 (3196614-3235487) | <i>Siphoviridae</i> | 38874 | 52.6 | 46 | ferredoxin-like protein YfhL<br>CGCACATGTCGCAGTTGAT                 | Query Coverage: 36%<br>Identities: 84,24% | Unpublished                |

**Table S8.** List of strains used in this study. All the strains are included in the collection of microorganisms of the Institute of Microbiology at the University of Warsaw (Poland).

| Strain                                           | Source of isolation   | Use in this study               | Source/ References               |
|--------------------------------------------------|-----------------------|---------------------------------|----------------------------------|
| <i>Escherichia coli</i> TOP10F'                  | laboratory strain     | Host strain for gene cloning    | Invitrogen, Waltham, MA, USA     |
| <i>E. coli</i> ER2566                            | laboratory strain     | Host strain for gene expression | New England BioLabs, Ipswich, MA |
| <i>E. coli</i> ER2929 Dam <sup>-</sup>           | laboratory strain     | Host strain for gene expression | [57]                             |
| <i>Serratia</i> sp. OS31                         | gold and arsenic mine | Host strain for BZS1            | Obtained from Ł. Drewniak        |
| <i>Serratia</i> sp. BZSmr3                       | gold and arsenic mine | as a potential host for phages  | This work                        |
| <i>Serratia</i> sp. BZSmr6                       | gold and arsenic mine | as a potential host for phages  | This work                        |
| <i>Yesinia enterolitica</i> 2/O:9                | clinical strain       | as a potential host for phages  | [58]                             |
| <i>Escherichia coli</i> strain 211_ECOL          | clinical strain       | as a potential host for phages  | [59]                             |
| <i>Serratia macescens</i> strain 666_SMAR        | clinical strain       | as a potential host for phages  | [59]                             |
| <i>Serratia macescens</i> MK                     | food products         | as a potential host for phages  | Obtained from D. Korsak          |
| <i>Salmonella enterica</i> ser. Typhimurium 2119 | food products         | as a potential host for phages  | Obtained from D. Korsak          |
| <i>Salmonella infantis</i> 2182                  | food products         | as a potential host for phages  | Obtained from D. Korsak          |
| <i>Salmonella enterica</i> ser. Virchow 2157     | food products         | as a potential host for phages  | Obtained from D. Korsak          |
| <i>Salmonella enterica</i> ser. Saintpaul 2015   | food products         | as a potential host for phages  | Obtained from D. Korsak          |
| <i>Salmonella enterica</i> ser. Enteritidis 1740 | food products         | as a potential host for phages  | Obtained from D. Korsak          |
| <i>Salmonella</i> sp. type Oranienburg 2016      | food products         | as a potential host for phages  | Obtained from D. Korsak          |
| <i>Cronobacter sakazakii</i> MK_1                | food products         | as a potential host for phages  | Obtained from D. Korsak          |
| <i>Cronobacter turicensis</i> MK_3               | food products         | as a potential host for phages  | Obtained from D. Korsak          |
| <i>Cronobacter malonaticus</i> MK_11             | food products         | as a potential host for phages  | Obtained from D. Korsak          |
| <i>Cronobacter dublinensis</i> MK_8              | food products         | as a potential host for phages  | Obtained from D. Korsak          |
| <i>Cronobacter muytjensii</i> MK_5               | food products         | as a potential host for phages  | Obtained from D. Korsak          |

**Table S9.** Oligonucleotide primers used in this study.

| Name of the primer | Primer sequence (5'→3') <sup>1</sup>        | Restriction site created and used for cloning | Plasmid vector and restriction sites used for cloning | Name of the construct |
|--------------------|---------------------------------------------|-----------------------------------------------|-------------------------------------------------------|-----------------------|
| BZS1attLf          | CCTGTCATGAGTGAAATAGCGAGCTCTG                | -                                             | pUC/SmaI                                              | pKS_BZS1attL          |
| BZS1attLr          | GTTGGGAATCGATAGAAATGGTGCGTAG                | -                                             |                                                       |                       |
| BZS1attRf          | CTATATCTGCATACTGCTGATGAGTCG                 | -                                             | pUC/SmaI                                              | pKS_BZS1attR          |
| BZS1attRr          | GATACGATCGAGAAAGCGACAATGC                   | -                                             |                                                       |                       |
| cosBZS1f           | CACCGTGCTCGTATACGTAC                        | -                                             | pUC/SmaI                                              | pKS_cosBZS1           |
| cosBZS1r           | GTTACCTGACTTGTACCCGAG                       | -                                             |                                                       |                       |
| MetBZS1f           | GTTGTT <b>CATATG</b> GCCTATCAACTTATCTATGC   | NdeI                                          | pET30a<br>NdeI/XhoI                                   | pET_PhiBZS1_p32       |
| MetBZS1r           | GTTGTT <b>CTCGAG</b> GTTAGTTCTCTTGCTGTGCTAC | XhoI                                          |                                                       |                       |
| MetOS31f           | GTTGTT <b>CATATG</b> TCAATGGTCACAAGCGAAC    | NdeI                                          | pET30a<br>NdeI/XhoI                                   | pET_PhiOS31_p25       |
| MetOS31r           | GTTGTT <b>CTCGAG</b> GTTACTCGGGAAGATTTC     | XhoI                                          |                                                       |                       |
| MinCF              | CTCGTTGGTAAGATGCTGGATAAG                    | -                                             | -                                                     | -                     |
| MinCr              | GCTTATTGTGAAGAGCCATAATACC                   | -                                             | -                                                     | -                     |
| MCf                | GTCATGAGGGTTATGGTCTTAACC                    | -                                             | -                                                     | -                     |
| MCr                | GCAAGGCCATCGTAATGCGG                        | -                                             | -                                                     | -                     |

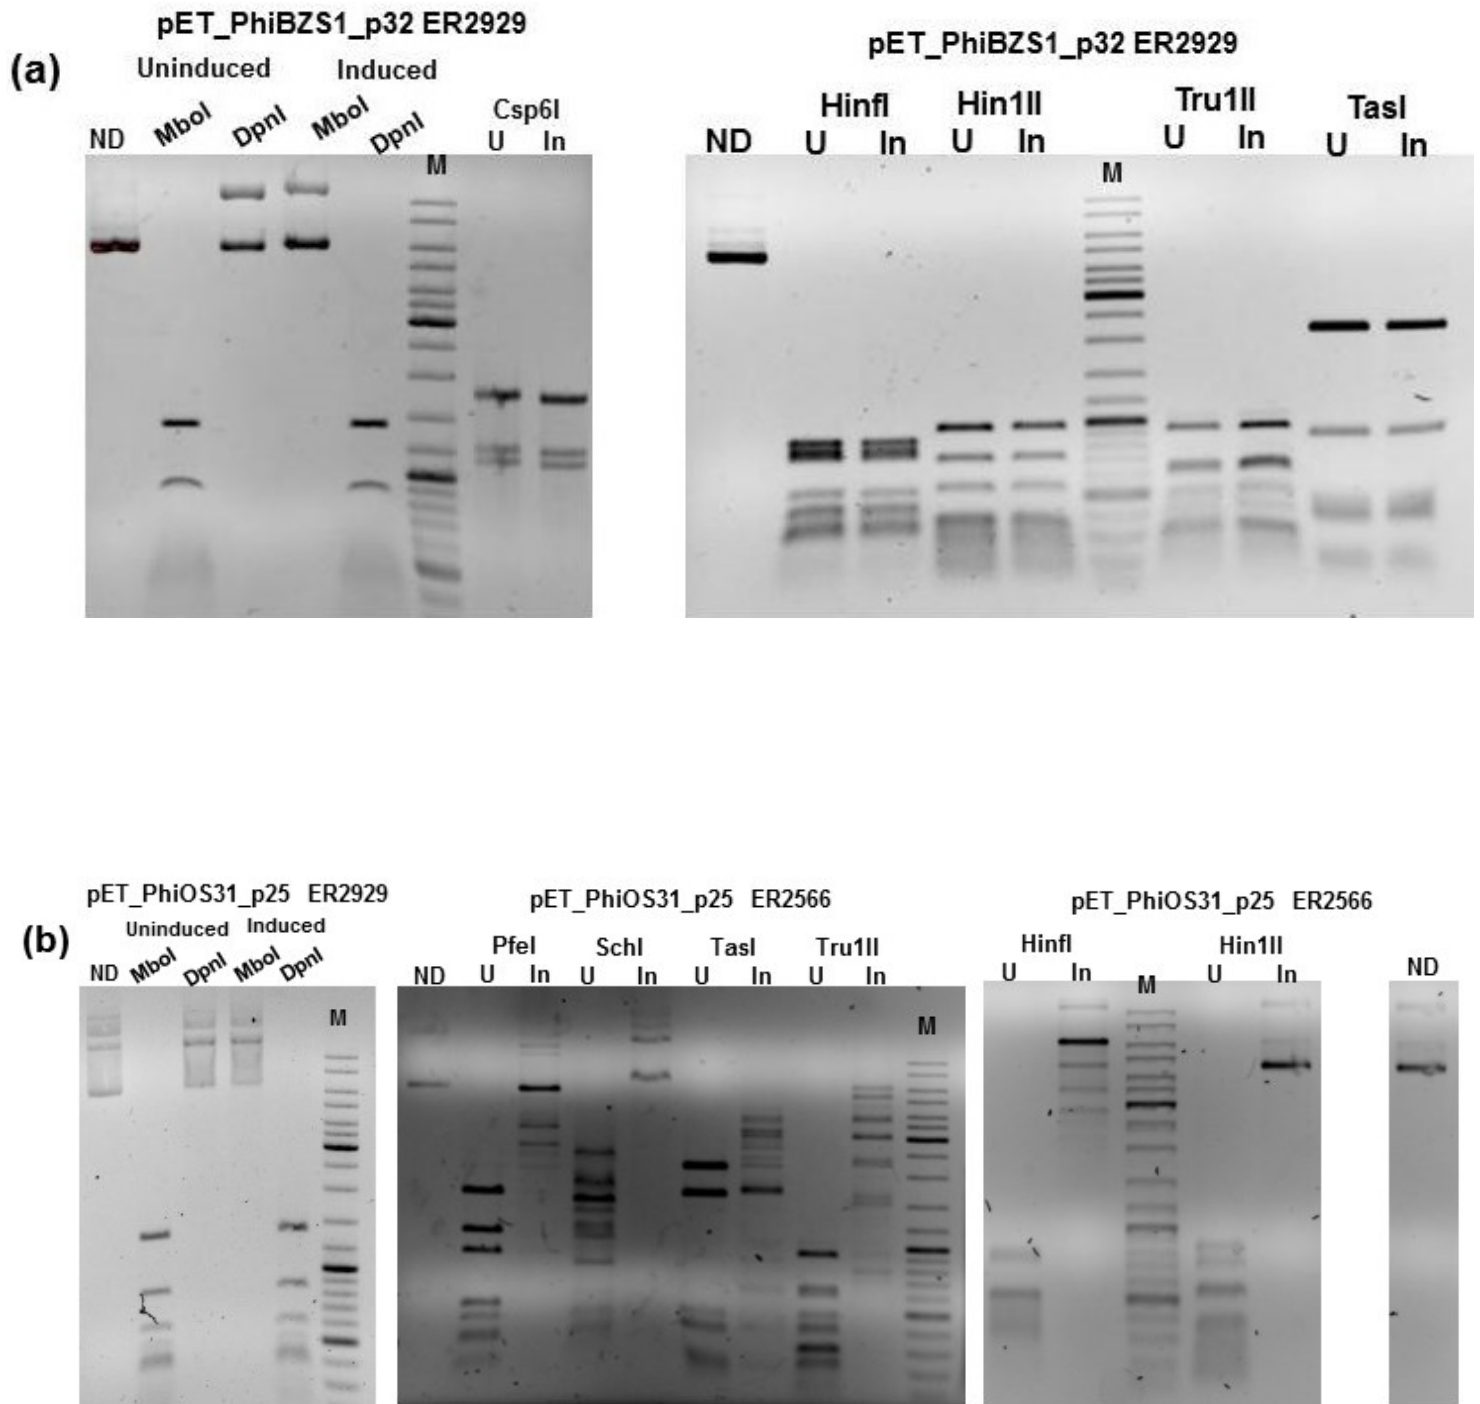

**Figure S1. Comparative restriction patterns of plasmid DNAs prepared from *E. coli* cells grown in the presence or absence of inducer IPTG and cleaved with selected restriction enzymes (REases).** Comparison of the restriction patterns of the plasmid pET\_PhiBZS1\_p32 DNA isolated from the *E. coli* ER2929 cells grown in the presence (In) or absence (U) of the inducer (IPTG) and cleaved with the selected REases (**a**); the plasmid pET\_PhiOS31\_p25 isolated from the *E. coli* ER2929 cells grown in the presence (In) or absence (U) of the inducer (IPTG) and cleaved with the selected REases and the plasmid pET\_PhiOS31\_p25 isolated from the *E. coli* ER2566 cells grown in the presence (In) or absence (U) of the inducer (IPTG) and cleaved with the selected REases (**b**). Digest mixtures were electrophoresed on 0.9% agarose gels and stained with ethidium bromide. ND-undigested, DNA, M – GeneRuler DNA Ladder Mix 100-10,000 bp size marker (Thermo Fisher Scientific).

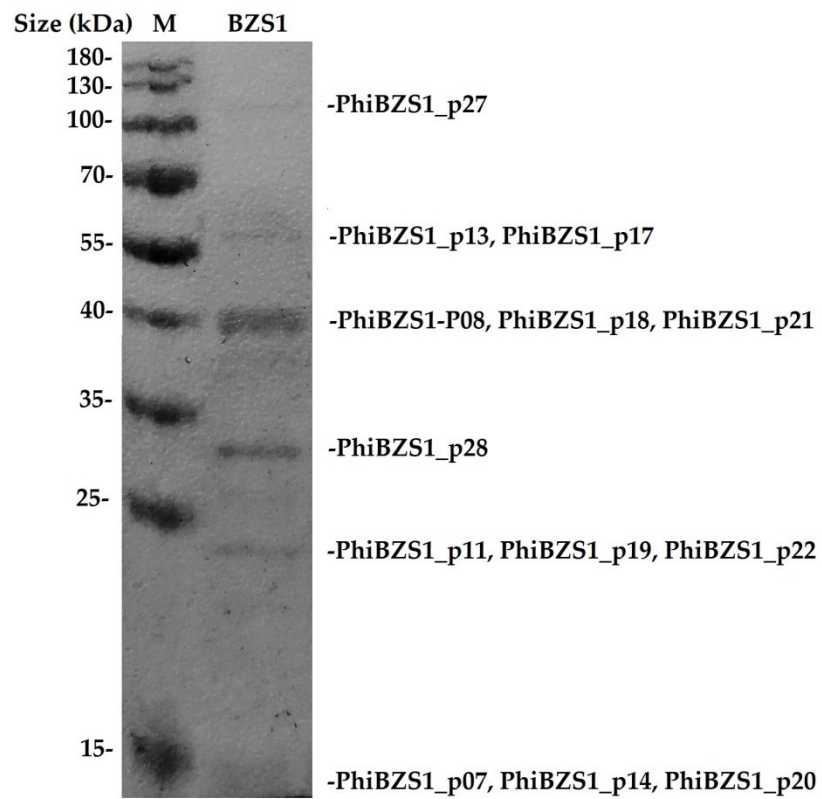

**Figure S2. Analysis of the BZS1 virion proteins by SDS-PAGE (12%).** Lane M, Page Ruler protein ladder SM0671 (Thermo Scientific). Proteins identified by mass spectrometry are shown on the right.



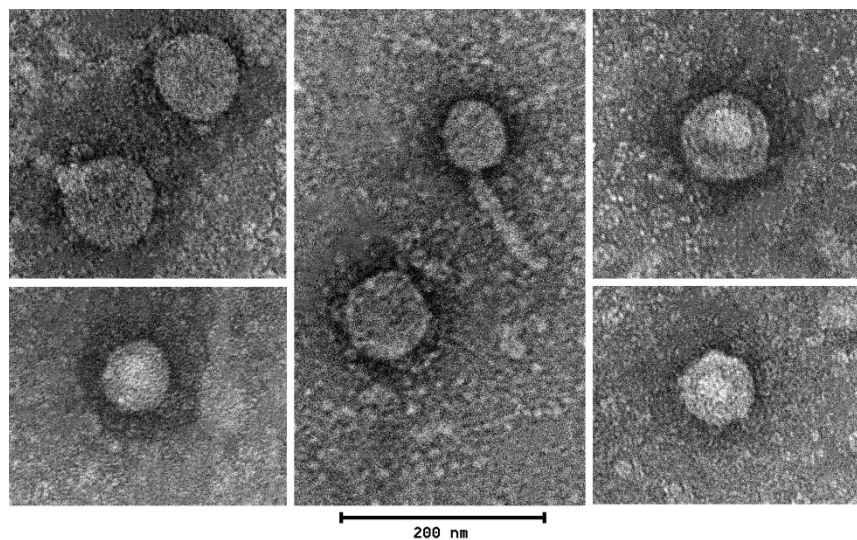

**Figure S3. Electron micrographs of negatively stained OS31 virions.** The scale bar in the transmission electron microscopy image represents 200 nm.

**(a)**

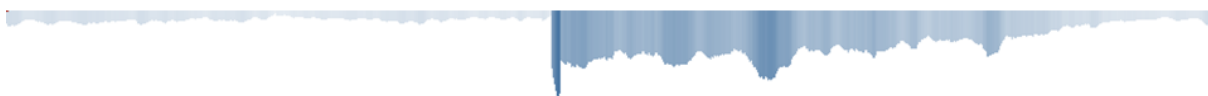

**(b)**

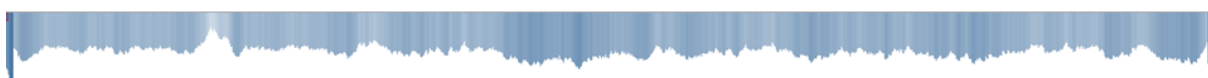

**Figure S4.** Visualization of coverage of the Illumina reads from the whole genome sequence analysis of OS31 **(a)** and BZS1 (as a control) **(b)** using Tablet [60,61] as graphical viewer. The Sequence Alignment/Map (SAM) formats were prepared using web-based platform Galaxy (<https://usegalaxy.org/>). Presented coverage ranges to c.a. 1600x and 500x in case of OS31 and BZS1, respectively.

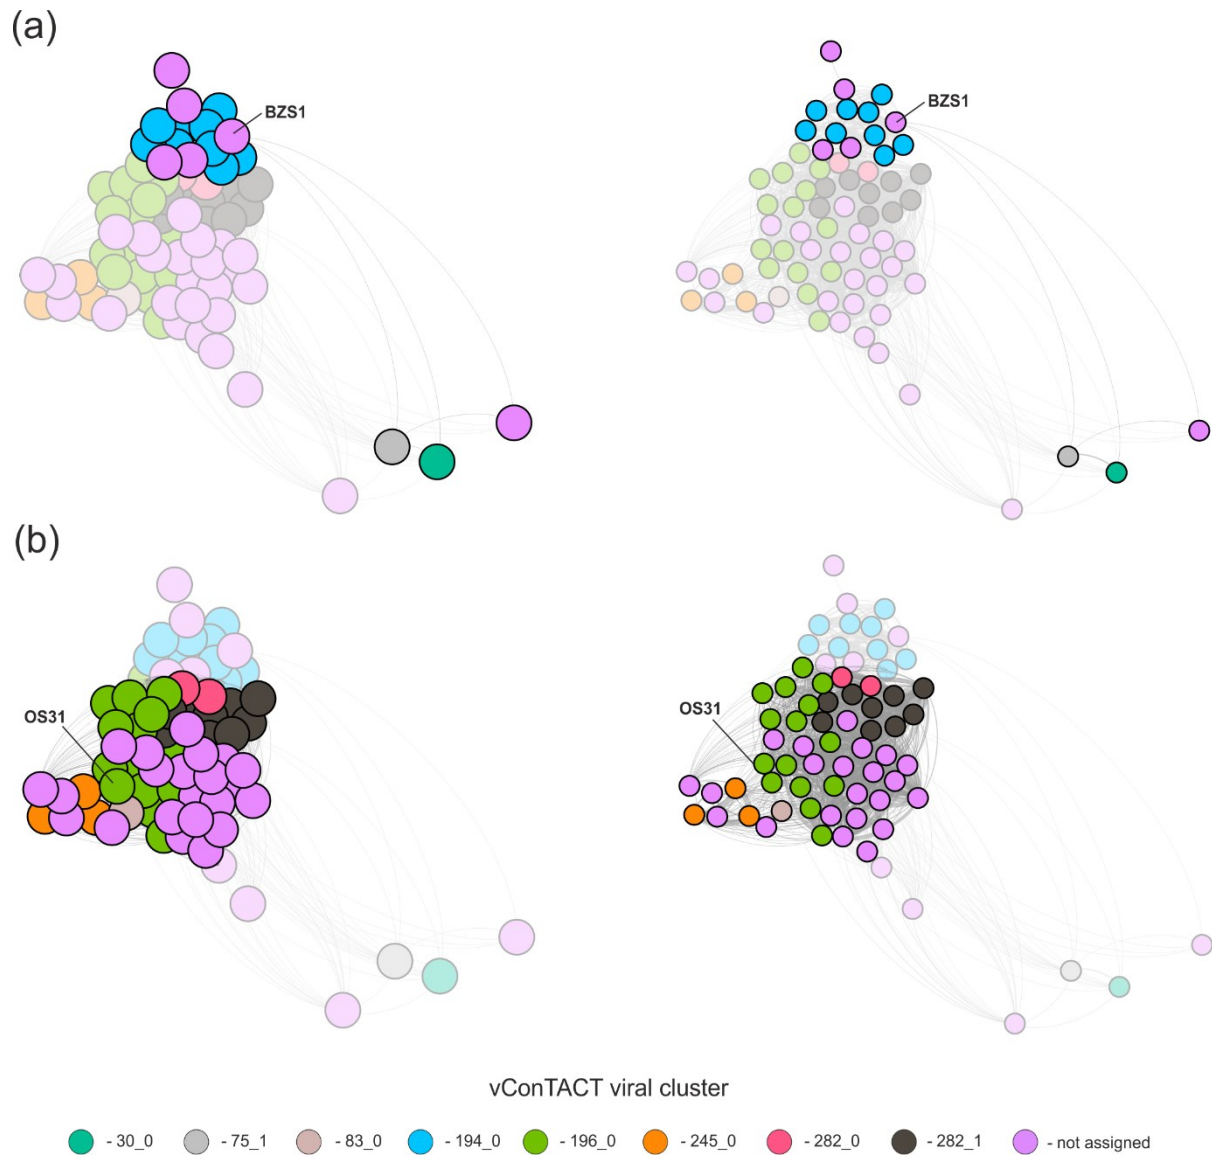

**Figure S5.** Protein-based phage similarity network. The networks representing BZS1 **(a)** and OS31 **(b)** phages with their neighbors were presented in a dense (left panels; as shown on Figure 4) and relaxed (right panels) layout. The nodes were colored based on the vConTACT v0.93 viral clusters.

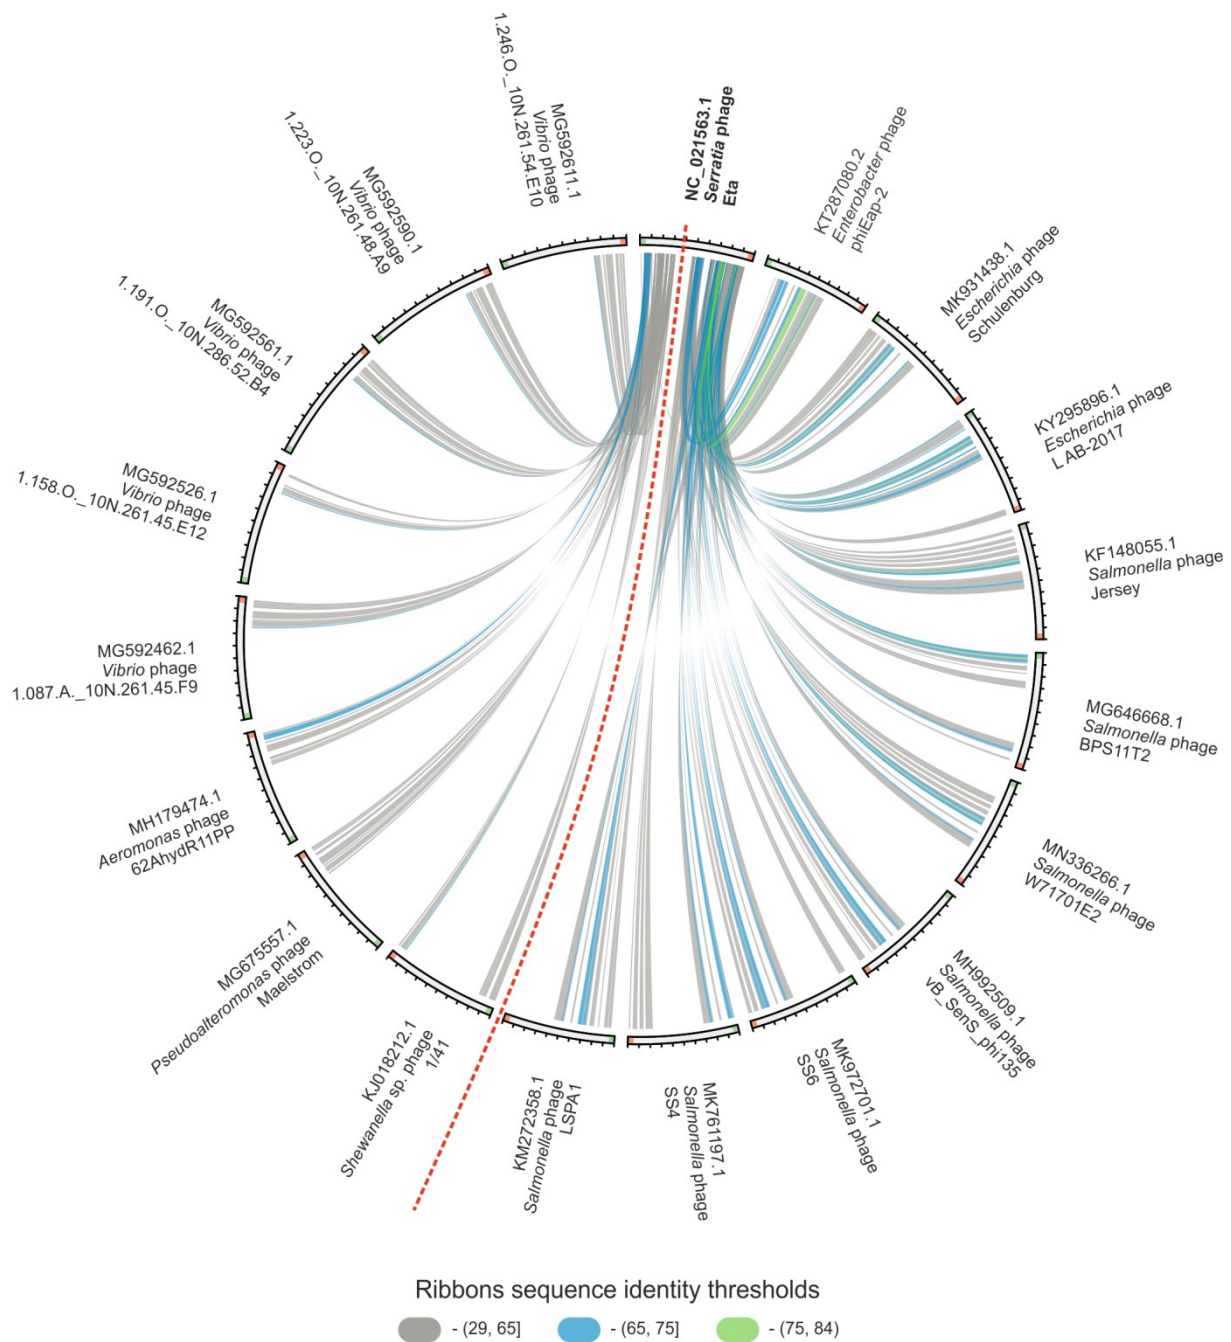

**Figure S6. The comparison of *Serratia* phage Eta with other phages.** The comparison was based on the protein sequence identity shown with ribbons according the legend. The anchors of ribbons correspond to protein-encoding genes location. Green and orange rectangles at the ends of ideograms reflect the beginning and end of phage genome.

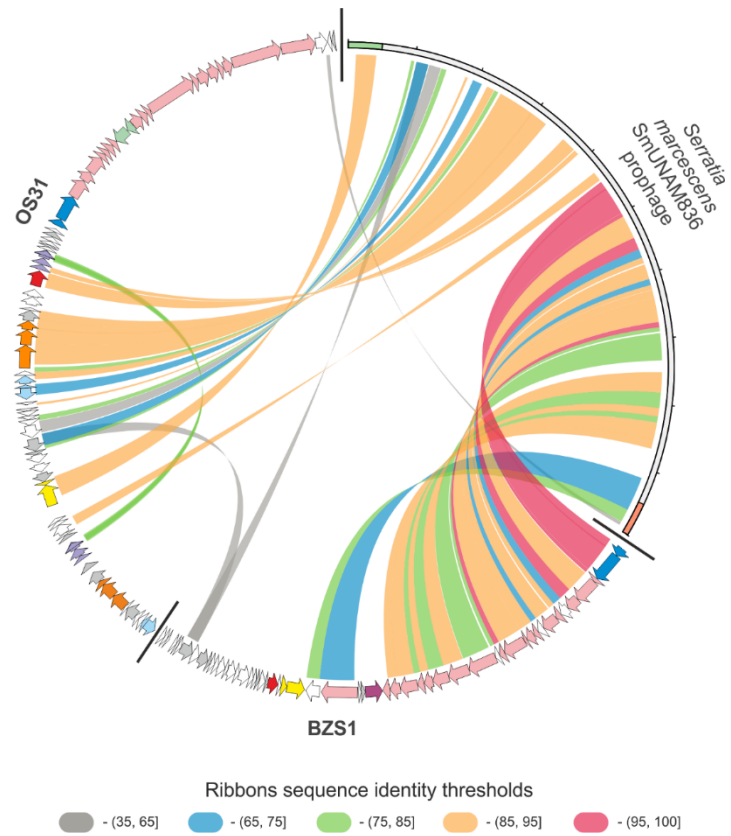

**Figure S7.** The all against all protein-based comparison of BZS1 and OS31 with a *Serratia marcescens* SmUNAM836 prophage (CP012685.1, coordinates: 3321604-3366650). Ribbons indicate sequence identity as shown on the legend. The anchors of ribbons correspond to protein-encoding genes location. Green and orange rectangles at the ends of *S. marcescens* SmUNAM836 prophage ideogram reflect the beginning and end of the prophage genome.

## References

1. Tian, C., et al., *Identification and molecular characterization of Serratia marcescens phages vB\_SmaA\_2050H1 and vB\_SmaM\_2050HW*. Arch Virol, 2019. **164**(4): p. 1085-1094.
2. Regué, M., C. Fabregat, and M. Viñas, *A generalized transducing bacteriophage for Serratia marcescens*. Res Microbiol, 1991. **142**(1): p. 23-7.
3. Casey, E., et al., *Genome Sequence of*. Genome Announc, 2017. **5**(23).
4. Chen, B., et al., *Environmental T4-Family Bacteriophages Evolve to Escape Abortive Infection via Multiple Routes in a Bacterial Host Employing "Altruistic Suicide" through Type III Toxin-Antitoxin Systems*. Front Microbiol, 2017. **8**: p. 1006.
5. Denyes, J.M., et al., *The genome and proteome of Serratia bacteriophage η which forms unstable lysogens*. Virol J, 2014. **11**: p. 6.
6. Xing, S., et al., *First complete genome sequence of a virulent bacteriophage infecting the opportunistic pathogen Serratia rubidaea*. Arch Virol, 2017. **162**(7): p. 2021-2028.
7. Jackson, S.A., et al., *Imprecise Spacer Acquisition Generates CRISPR-Cas Immune Diversity through Primed Adaptation*. Cell Host Microbe, 2019. **25**(2): p. 250-260.e4.
8. Matilla, M.A. and G.P. Salmond, *Complete genome sequence of Serratia plymuthica bacteriophage ΦMAM1*. J Virol, 2012. **86**(24): p. 13872-3.
9. Price, L., et al., *Complete Genome Sequence of Serratia marcescens Myophage Moabite*. Microbiol Resour Announc, 2019. **8**(29).
10. Graham, K., et al., *Complete Genome Sequence of Serratia marcescens Phage MTx*. Microbiol Resour Announc, 2019. **8**(25).
11. Campbell, S., et al., *Complete Genome Sequence of*. Microbiol Resour Announc, 2020. **9**(1).
12. Cooper, S., et al., *Complete Genome Sequence of Serratia marcescens Myophage MyoSmar*. Microbiol Resour Announc, 2019. **8**(38).
13. Bockoven, R., et al., *Complete Genome Sequence of Serratia marcescens Podophage Parlo*. Microbiol Resour Announc, 2019. **8**(27).
14. Malone, L.M., et al., *A jumbo phage that forms a nucleus-like structure evades CRISPR-Cas DNA targeting but is vulnerable to type III RNA-based immunity*. Nat Microbiol, 2020. **5**(1): p. 48-55.
15. Melbern, L., et al., *Complete Genome Sequence of Serratia marcescens Podophage Pila*. Microbiol Resour Announc, 2020. **9**(1).
16. Teng, T., et al., *Complete genome sequence analysis of PS2, a novel T4-like bacteriophage that infects Serratia marcescens clinical isolates*. Arch Virol, 2018. **163**(7): p. 1997-2000.
17. Koehler, B.T., et al., *Complete Genome Sequence of Serratia marcescens Siphophage Scapp*. Microbiol Resour Announc, 2019. **8**(19).
18. Williams, E.A., et al., *Complete Genome Sequence of Serratia marcescens Siphophage Serbin*. Microbiol Resour Announc, 2019. **8**(19).
19. Snowden, J., et al., *Complete Genome Sequence of Serratia marcescens Siphophage Slocum*. Microbiol Resour Announc, 2020. **9**(1).
20. Hao, Y., et al., *Complete Genome Sequence of Bacteriophage SM9-3Y Infecting*. Genome Announc, 2018. **6**(1).
21. Recktenwald, J. and H. Schmidt, *The nucleotide sequence of Shiga toxin (Stx) 2e-encoding phage phiP27 is not related to other Stx phage genomes, but the modular genetic structure is conserved*. Infect Immun, 2002. **70**(4): p. 1896-908.
22. Sun, Q., et al., *Isolation and genomic characterization of Sfl, a serotype-converting bacteriophage of Shigella flexneri*. BMC Microbiol, 2013. **13**: p. 39.
23. Allison, G.E., et al., *Complete genomic sequence of SfV, a serotype-converting temperate bacteriophage of Shigella flexneri*. J Bacteriol, 2002. **184**(7): p. 1974-87.
24. Mavrodi, D.V., et al., *Mobile genetic elements in the genome of the beneficial rhizobacterium Pseudomonas fluorescens Pf-5*. BMC Microbiol, 2009. **9**: p. 8.
25. Korol, N.A. and F.I. Tovkach, *Identification of the major proteins of the virions of bacteriophage ZF40 Pectobacterium carotovorum*. Mikrobiol Z, 2012. **74**(4): p. 64-70.
26. Paradiso, R., et al., *Complete Genome Sequence of a Myoviridae Bacteriophage Infecting Salmonella enterica Serovar Typhimurium*. Genome Announc, 2016. **4**(5).

27. Mmolawa, P.T., H. Schmieger, and M.W. Heuzenroeder, *Bacteriophage ST64B, a genetic mosaic of genes from diverse sources isolated from Salmonella enterica serovar typhimurium DT 64*. J Bacteriol, 2003. **185**(21): p. 6481-5.
28. George, D.T., et al., *Complete Genome Sequence of SfII, a Serotype-Converting Bacteriophage of the Highly Prevalent Shigella flexneri Serotype 2a*. Genome Announc, 2013. **1**(5).
29. Jakhelia, R., K.A. Talukder, and N.K. Verma, *Isolation, characterization and comparative genomics of bacteriophage SfIV: a novel serotype converting phage from Shigella flexneri*. BMC Genomics, 2013. **14**: p. 677.
30. Juhala, R.J., et al., *Genomic sequences of bacteriophages HK97 and HK022: pervasive genetic mosaicism in the lambdoid bacteriophages*. J Mol Biol, 2000. **299**(1): p. 27-51.
31. Woods, D.E., et al., *Burkholderia thailandensis E125 harbors a temperate bacteriophage specific for Burkholderia mallei*. J Bacteriol, 2002. **184**(14): p. 4003-17.
32. Creuzburg, K., et al., *The Shiga toxin 1-converting bacteriophage BP-4795 encodes an NleA-like type III effector protein*. J Bacteriol, 2005. **187**(24): p. 8494-8.
33. DeShazer, D., *Genomic diversity of Burkholderia pseudomallei clinical isolates: subtractive hybridization reveals a Burkholderia mallei-specific prophage in B. pseudomallei 1026b*. J Bacteriol, 2004. **186**(12): p. 3938-50.
34. Casjens, S.R., et al., *The pKO2 linear plasmid prophage of Klebsiella oxytoca*. J Bacteriol, 2004. **186**(6): p. 1818-32.
35. Zhang, Y., et al., *Lineage and host source are both correlated with levels of Shiga toxin 2 production by Escherichia coli O157:H7 strains*. Appl Environ Microbiol, 2010. **76**(2): p. 474-82.
36. Seed, K.D. and J.J. Dennis, *Isolation and characterization of bacteriophages of the Burkholderia cepacia complex*. FEMS Microbiol Lett, 2005. **251**(2): p. 273-80.
37. Lee, J.H., et al., *Complete genome sequence of Cronobacter sakazakii temperate bacteriophage phiES15*. J Virol, 2012. **86**(14): p. 7713-4.
38. Lee, Y.D. and J.H. Park, *Complete genome of temperate phage ENT39118 from Cronobacter sakazakii*. J Virol, 2012. **86**(9): p. 5400-1.
39. Strauch, E., et al., *Bacteriophage 2851 is a prototype phage for dissemination of the Shiga toxin variant gene 2c in Escherichia coli O157:H7*. Infect Immun, 2008. **76**(12): p. 5466-77.
40. Ogura, Y., et al., *The Shiga toxin 2 production level in enterohemorrhagic Escherichia coli O157:H7 is correlated with the subtypes of toxin-encoding phage*. Sci Rep, 2015. **5**: p. 16663.
41. Villa, L., et al., *Diversity, virulence, and antimicrobial resistance of the KPC-producing*. Microb Genom, 2017. **3**(4): p. e000110.
42. Kyle, J.L., et al., *Escherichia coli serotype O55:H7 diversity supports parallel acquisition of bacteriophage at Shiga toxin phage insertion sites during evolution of the O157:H7 lineage*. J Bacteriol, 2012. **194**(8): p. 1885-96.
43. Moreno Switt, A.I., et al., *Genomic characterization provides new insight into Salmonella phage diversity*. BMC Genomics, 2013. **14**: p. 481.
44. Yang, Z., et al., *Complete genome analysis of bacteriophage AsXd-1, a new member of the genus Hk97virus, family Siphoviridae*. Arch Virol, 2018. **163**(11): p. 3195-3197.
45. Chen, Y., et al., *Isolation and characterization of a novel temperate bacteriophage from gut-associated Escherichia within black soldier fly larvae (Hermetia illucens L. [Diptera: Stratiomyidae])*. Arch Virol, 2019. **164**(9): p. 2277-2284.
46. Bleriot, I., et al., *Genomic analysis of 40 prophages located in the genomes of 16 carbapenemase-producing clinical strains of*. Microb Genom, 2020.
47. Chen, Y., et al., *Specific Integration of Temperate Phage Decreases the Pathogenicity of Host Bacteria*. Front Cell Infect Microbiol, 2020. **10**: p. 14.
48. Zolodowska, S., et al., *High genomic variability in the plant pathogenic bacterium Pectobacterium parmentieri deciphered from de novo assembled complete genomes*. BMC Genomics, 2018. **19**(1): p. 751.
49. Sandner-Miranda, L., et al., *Complete Genome Sequence of Serratia marcescens SmUNAM836, a Nonpigmented Multidrug-Resistant Strain Isolated from a Mexican Patient with Obstructive Pulmonary Disease*. Genome Announc, 2016. **4**(1).
50. Alabed, D., et al., *Draft Genome Sequence of*. Microbiol Resour Announc, 2019. **8**(3).
51. Li, Z., et al., *Complete Genome Sequences of Two Porcine Enterotoxigenic Escherichia coli Strains*. Genome Announc, 2018. **6**(8).

52. Nicholson, W.L., et al., *Complete Genome Sequence of Serratia liquefaciens Strain ATCC 27592*. Genome Announc, 2013. **1**(4).
53. Caneschi, W.L., et al., *Serratia liquefaciens FG3 isolated from a metallophyte plant sheds light on the evolution and mechanisms of adaptive traits in extreme environments*. Sci Rep, 2019. **9**(1): p. 18006.
54. Stein, M., et al., *Complete Genome Sequence of Tetracycline-Resistant Serratia liquefaciens S1, Isolated from Mixed Greens, Obtained Using Illumina MiSeq and Oxford Nanopore MinION Sequencing*. Microbiol Resour Announc, 2020. **9**(19).
55. Sakuraoaka, R., T. Suzuki, and T. Morohoshi, *Distribution and Genetic Diversity of Genes Involved in Quorum Sensing and Prodigiosin Biosynthesis in the Complete Genome Sequences of Serratia marcescens*. Genome Biol Evol, 2019. **11**(3): p. 931-936.
56. Weise, T., et al., *VOC emission of various Serratia species and isolates and genome analysis of Serratia plymuthica 4Rx13*. FEMS Microbiol Lett, 2014. **352**(1): p. 45-53.
57. Siwek, W., et al., *Crystal structure and mechanism of action of the N6-methyladenine-dependent type IIM restriction endonuclease R.DpnI*. Nucleic Acids Res, 2012. **40**(15): p. 7563-72.
58. Okwori, A.E., et al., *Pathogenic Yersinia enterocolitica 2/O:9 and Yersinia pseudotuberculosis 1/O:1 strains isolated from human and non-human sources in the Plateau State of Nigeria*. Food Microbiol, 2009. **26**(8): p. 872-5.
59. Roach, D.J., et al., *A Year of Infection in the Intensive Care Unit: Prospective Whole Genome Sequencing of Bacterial Clinical Isolates Reveals Cryptic Transmissions and Novel Microbiota*. PLoS Genet, 2015. **11**(7): p. e1005413.
60. Milne, I., et al., *Tablet--next generation sequence assembly visualization*. Bioinformatics, 2010. **26**(3): p. 401-2.
61. Milne, I., et al., *Tablet: Visualizing Next-Generation Sequence Assemblies and Mappings*. Methods Mol Biol, 2016. **1374**: p. 253-68.
